# Supplementary material
Source: HighWire-hosted journal article supplement (http://www.qdcxjkg.com/highwire/filestream/113659/field_highwire_adjunct_files/0/ERJ-00324-2012_Disclosures.pdf)
Supplement: ERJ-00324-2012_Disclosures.pdf [file ERJ-00324-2012_Disclosures.pdf]

**B.C. Schock** has received a PDRA grant (8 months) from Phillip Morris in 2002 during her post-doctoral research at UC Davis, California.
